# Supplementary material for: Steam activation of pitch-based carbon fibers for increasing CO2 adsorption behaviors
Source: Royal Society of Chemistry journal article supplement (doi:10.1039/d5ta00486a), 2025-01-01
Supplement: d5ta00486a1.pdf [file d5ta00486a1.pdf]

## Supporting Information

### Steam Activation of Pitch-Based Carbon Fiber for Increasing CO<sub>2</sub> Adsorption Behaviors

Choong-Hee Kim, Seul-Yi Lee\*, and Soo-Jin Park\*

*\*Department of Chemistry, Inha University, 100 Inharo, Incheon 22212, South Korea*

\* Corresponding author.

*E-mail address: [sjpark@inha.ac.kr](mailto:sjpark@inha.ac.kr) (S. -J. Park), [leesy@inha.ac.kr](mailto:leesy@inha.ac.kr) (S. -Y. Lee)*

## Characterization

The thermodynamic properties of the coffee grounds (precursor) were evaluated by thermal gravimetric and differential thermal analysis (TG-DTA, TG 209 F3, NETZSCH, Germany); the samples were heated up to 1073 K at a rate of 10 K min<sup>-1</sup> under an N<sub>2</sub> atmosphere. The surface morphologies of all the samples were analyzed by scanning electron microscopy (SEM, Model SU8010, Hitachi Co. Japan). X-ray diffraction (XRD) patterns were measured using the D2 PHASER system (Bruker, Germany) at 30 kV and 10 mA with Cu-K $\alpha$  radiation. The elemental composition and chemical bond energy on the AC surfaces were analyzed by X-ray photoelectron spectroscopy (XPS, Thermo Scientific, K-Alpha, USA). The CO<sub>2</sub> and N<sub>2</sub> gas adsorption isotherms of the samples were measured with an automatic gas adsorption analyzer (Anton parr, autosorb iQ, USA). The pore size distribution and specific surface area for carbonaceous slit-like pores were determined from the N<sub>2</sub> adsorption–desorption isotherms using the quench solid density functional theory (NLDFT) model and Brunauer–Emmett–Teller (BET) method, respectively.

## Adsorption under flue gas condition (gravimetric analysis)

The experimental setup used for the binary mixture gas adsorption measurements is shown in **Fig. S1**. The flue gas adsorption measurements were performed using a thermogravimetric analyzer (TGA, Pyris 1, PerkinElmer, USA). Before the measurements, the samples were heated to 200 K at a rate of 5 K min<sup>-1</sup> for 6 h in vacuum to remove organic impurities and moisture. In the adsorption stage, the temperature was maintained at 313 K for 1 h under a mixed gas atmosphere containing

15% CO<sub>2</sub> and 85% N<sub>2</sub>, which is similar to the flue gas composition of a fossil-fuel power plant. In the desorption stage, a non-heating desorption process was performed for 1 h in vacuum rather than under the flue gas atmosphere.

### Adsorption Kinetics study

Adsorption kinetics, cyclic stability, and facile regeneration are equally important factors just like high CO<sub>2</sub> adsorption capacity. To evaluate the adsorption kinetics, here we have measured time-dependent CO<sub>2</sub> adsorption isotherms of SCF-800 using TGA at various temperatures 303, 313, and 323 K under atmospheric pressure (see manuscript). To estimate the CO<sub>2</sub> kinetics, the experimental data was fitted by pseudo-first-order and pseudo-second-order models. Both models explain adsorption rate where pseudo-first-order depends upon the number of adsorption sites (**Eq. S1**) while pseudo-second-order assumes square of the number of adsorption sites (**Eq. S2**).

$$q_t = q_e(1 - e^{-k_1 t}) \quad (\text{S1})$$

$$q_t = \frac{1}{\frac{1}{k_2 q_e^2 t} + \frac{1}{q_e}} \quad (\text{S2})$$

Here,  $q_e$ , and  $q_t$  denotes adsorption uptakes at equilibrium and time “t”, respectively. Additionally,  $k_1$ ,  $k_2$  denote adsorption rate constants obtained by fitting the experimental data with pseudo-first and pseudo second-order, respectively. Notably, pseudo first-order best fits the experimental data with  $R^2 > 0.99$  at all temperatures, compared to pseudo second-order, which further indicates the physical adsorption mechanism of CO<sub>2</sub> capture<sup>1,2</sup>. Additionally, the activation energy was also determined using the following **Eq. S3**.

$$k_1 = A \exp\left(-\frac{E_a}{RT}\right) \quad (S3)$$

Here “A” is Arrhenius's exponential factor, “E<sub>a</sub>” is the activation energy, “R” is the universal gas constant, and “T” represents absolute temperature. A linear fitting graph between the natural log of k<sub>1</sub> and inverse of temperature (*i.e.*, 1/T) was drawn (see manuscript). The activation energy based on obtained fitted parameters was calculated to be 5.41 kJ mol<sup>-1</sup>, revealing the CO<sub>2</sub> adsorption mechanism predominantly physisorption<sup>3</sup>.

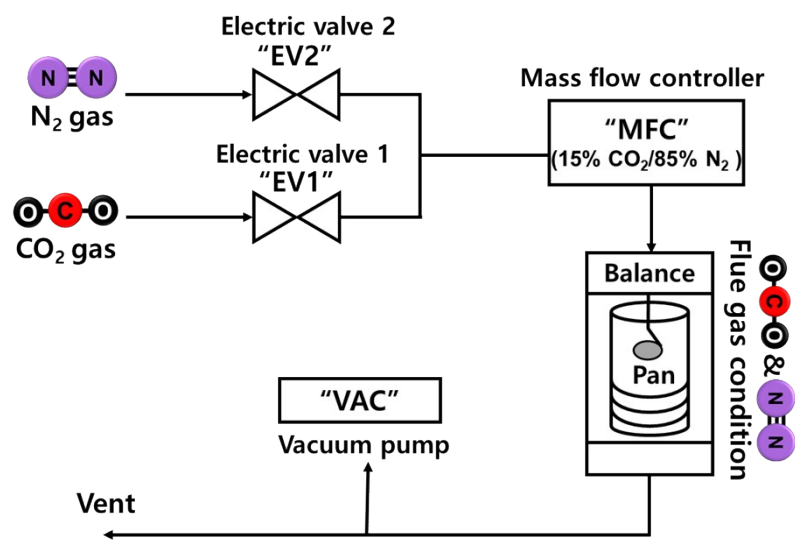

**Fig. S1.** Experimental setup of the binary mixture gas adsorption (gravimetric analysis) and cycling measurements

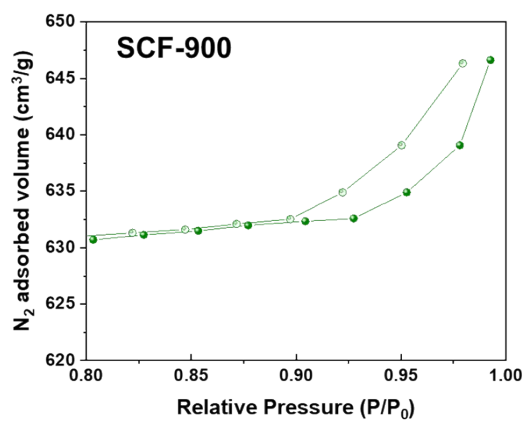

**Fig. S2.** N<sub>2</sub> adsorption–desorption isotherms of the prepared samples at 77 K in SCF-900 (P/P<sub>0</sub> range of 0.8–0.99)

**Table. S1** The Elemental compositions determined by XPS and chemical EA

| Samples | Elemental analysis (wt.%) |                |                | XPS analysis (at.%) |                |
|---------|---------------------------|----------------|----------------|---------------------|----------------|
|         | C <sup>a</sup>            | O <sup>b</sup> | H <sup>c</sup> | C <sup>a</sup>      | O <sup>b</sup> |
| PACF    | 92.9                      | 3.3            | 2.0            | 96.4                | 3.6            |
| SCF-500 | 91.5                      | 3.4            | 1.8            | 96.2                | 3.8            |
| SCF-600 | 92.1                      | 3.9            | 1.9            | 95.1                | 4.9            |
| SCF-700 | 92.5                      | 4.2            | 1.8            | 94.9                | 5.1            |
| SCF-800 | 91.8                      | 4.6            | 1.6            | 93.6                | 6.4            |
| SCF-900 | 91.4                      | 5.2            | 1.4            | 92.7                | 7.2            |

<sup>a</sup> Carbon contents, <sup>b</sup> Oxygen contents, <sup>c</sup> Hydrogen contents

**Table S2.** Comparison of the specific surface area of ACFs prepared by physical activation

| Samples       | Precursor       | Activating agents                 | Activation conditions |          | Specific surface area (m <sup>2</sup> g <sup>-1</sup> ) | References |
|---------------|-----------------|-----------------------------------|-----------------------|----------|---------------------------------------------------------|------------|
|               |                 |                                   | Temp. (K)             | Time (h) |                                                         |            |
| SCF-800       | Pitch           | H <sub>2</sub> O                  | 1073                  | 1        | 1910                                                    | This work  |
| SCF-800       | Pitch           | H <sub>2</sub> O                  | 1173                  | 1        | 2564                                                    | This work  |
| HPAC950       | Petroleum pitch | CO <sub>2</sub> /H <sub>2</sub> O | 1223                  | 1        | 2046                                                    | 4          |
| HPAC1000      | Petroleum pitch | CO <sub>2</sub> /H <sub>2</sub> O | 1273                  | 1        | 2506                                                    | 4          |
| ACF-1123      | Commercial ACF  | H <sub>2</sub> O                  | 1123                  | 1        | 1900                                                    | 5          |
| ACF-1173      | Commercial ACF  | H <sub>2</sub> O                  | 1173                  | 1        | 3340                                                    | 5          |
| ACF-850-4     | Isotropic pitch | CO <sub>2</sub> /H <sub>2</sub> O | 1123                  | 1        | 1980                                                    | 6          |
| ACF-900-3     | Isotropic pitch | CO <sub>2</sub> /H <sub>2</sub> O | 1173                  | 1        | 2129                                                    | 6          |
| ACF-3         | Commercial CF   | H <sub>2</sub> O                  | 1173                  | 0.6      | 2650                                                    | 7          |
| ACF-4         | Commercial CF   | H <sub>2</sub> O                  | 1173                  | 0.8      | 3230                                                    | 7          |
| ETP-200-fiber | Ethylene Tar    | CO <sub>2</sub>                   | 1173                  | 1        | 922                                                     | 8          |
| ETP-250-fiber | Ethylene Tar    | CO <sub>2</sub>                   | 1173                  | 1        | 1047                                                    | 8          |

**Table S3.** Comparison of the CO<sub>2</sub> adsorption capacities of various ACFs

| Samples          | Precursor              | Activating agents | Activation conditions |          | Specific surface area (m <sup>2</sup> g <sup>-1</sup> ) | CO <sub>2</sub> uptakes at 298 K/1 bar (mmol g <sup>-1</sup> ) | References |
|------------------|------------------------|-------------------|-----------------------|----------|---------------------------------------------------------|----------------------------------------------------------------|------------|
|                  |                        |                   | Temp. (K)             | Time (h) |                                                         |                                                                |            |
| SCF-800          | Pitch                  | H <sub>2</sub> O  | 1073                  | 1        | 1910                                                    | 3.50                                                           | This work  |
| SCF-800          | Pitch                  | H <sub>2</sub> O  | 1173                  | 1        | 2564                                                    | 2.57                                                           | This work  |
| A-PAN/PVDF fiber | PAN/PVDF               | H <sub>2</sub> O  | 1173                  | 1        | 925                                                     | 2.21                                                           | 9          |
| CF-800-acf       | Cellulose              | H <sub>2</sub> O  | 1073                  | 1        | 863                                                     | 3.78                                                           | 10         |
| CF-850-acf       | Cellulose              | H <sub>2</sub> O  | 1123                  | 1        | 1018                                                    | 3.09                                                           | 10         |
| PCF-500          | PAN                    | Air               | 773                   | 1        | 486                                                     | 2.25                                                           | 11         |
| N-ACF-7/1        | Coal-based pitch blend | KOH               | 973                   | 1        | 969                                                     | 2.7                                                            | 12         |
| N-ACF-9/1        | Coal-based pitch blend | KOH               | 973                   | 1        | 1222                                                    | 2.6                                                            | 12         |
| aACF             | PAN                    | KOH               | 1073                  | 1        | 1565                                                    | 2.74                                                           | 13         |
| AC-900-3         | PAN                    | KOH               | 1173                  | 1        | 1294                                                    | 3.38                                                           | 14         |
| AC-900-3         | PAN/CO                 | KOH               | 1173                  | 1        | 1090                                                    | 3.28                                                           | 14         |
| MCF-A7/1         | Coal                   | KOH               | 973                   | 1        | 1240                                                    | 3.1                                                            | 15         |
| C800-A1:3        | PAN/Cellulose          | KOH               | 1073                  | 1        | 990                                                     | 2.99                                                           | 16         |
| PKS-AC           | Palm kernel shells     | KOH               | 1123                  | 2        | 1086                                                    | 3.39                                                           | 17         |
| NCLK3            | Coffee powder          | KOH               | 873                   | 1        | 840                                                     | 3.00                                                           | 18         |
| F-600-1          | Cow dung               | KOH               | 873                   | 1        | 1345                                                    | 3.26                                                           | 19         |

**Table. S4** The kinetic parameters for SCF-800 samples based on CO<sub>2</sub> adsorption data fitting using psuedo first-order and pseudo second-order models at 303, 313, and 323 K.

| Samples | Temperature (K) | Psuedo first-order                  |                | Psuedo second-order                                      |                |
|---------|-----------------|-------------------------------------|----------------|----------------------------------------------------------|----------------|
|         |                 | K <sub>1</sub> (min <sup>-1</sup> ) | R <sup>2</sup> | K <sub>2</sub> (mmol g <sup>-1</sup> min <sup>-1</sup> ) | R <sup>2</sup> |

|         |     |      |         |      |         |
|---------|-----|------|---------|------|---------|
| SCF-800 | 303 | 1.48 | 0.99816 | 1.96 | 0.85541 |
|         | 313 | 1.61 | 0.99224 | 2.23 | 0.86988 |
|         | 323 | 1.72 | 0.99801 | 2.86 | 0.91047 |

## Reference

1. S.-M. Hong, E. Jang, A. D. Dysart, V. G. Pol and K. B. Lee, *Scientific reports*, 2016, **6**, 1-10.
2. G. Nazir, A. Rehman and S.-J. Park, *Carbon*, 2022, **192**, 14-29.
3. A. E. Creamer, B. Gao and M. Zhang, *Chemical Engineering Journal*, 2014, **249**, 174-179.
4. J. H. Lee, Y. M. Kang and K. C. Roh, *Mater Chem Phys*, 2024, **312**.
5. Y. Yoshikawa, K. Teshima, R. Futamura, H. Tanaka, A. V. Neimark and K. Kaneko, *J Colloid Interf Sci*, 2020, **578**, 422-430.
6. Z. R. Yue, A. Vakili and J. W. Wang, *Chem Eng J*, 2017, **330**, 183-190.
7. H. M. Lee, L. K. Kwac, K. H. An, S. J. Park and B. J. Kim, *Energ Convers Manage*, 2016, **125**, 347-352.
8. H. P. Wang, J. X. Yang, J. Li, K. Shi and X. K. Li, *Sn Appl Sci*, 2019, **1**.
9. Y. J. Heo, Y. F. Zhang, K. Y. Rhee and S. J. Park, *Compos Part B-Eng*, 2019, **156**, 95-99.
10. Y. J. Heo and S. J. Park, *Energy*, 2015, **91**, 142-150.
11. L. Xiong, X. F. Wang, L. Li, L. Jin, Y. G. Zhang, S. L. Song and R. P. Liu, *Energ Fuel*, 2019, **33**, 12558-12567.
12. N. Diez, P. Alvarez, M. Granda, C. Blanco, R. Santamaría and R. Menéndez, *Micropor Mesopor Mat*, 2015, **201**, 10-16.
13. Y. C. Chiang, C. Y. Yeh and C. H. Weng, *Appl Sci-Basel*, 2019, **9**.
14. S. Kocak, C. Akduman, J. Yanik, E. P. A. Kumbasar and A. Cay, *Polymer Engineering & Science*, 2024, **64**, 1355-1364.
15. N. Diez, P. Alvarez, M. Granda, C. Blanco, R. Santamaría and R. Menéndez, *Chem Eng J*, 2015, **281**, 704-712.
16. T. T. Yalçinkaya, A. Çay, Ç. Akduman, E. P. A. Kumbasar and J. Yanik, *J Appl Polym Sci*, 2024, **141**.
17. Gopalan, J., Buthiyappan, A., Rashidi, N. A., Sufian, S., & Abdul Raman, A. A. *Environmental Science and Pollution Research*, 2024, **31**.
18. Plaza, M. G., González, A. S., Pevida, C., Pis, J. J., & Rubiera, F. *Applied energy*, 2012, **99**.
19. Wu, R., & Bao, A. *Journal of CO2 Utilization*, 2023 **68**
